# Supplementary material
Source: PubMed Central journal article supplement (PMC4181068)
Supplement: hdy201437x2.pdf [file hdy201437x2.pdf]

**Supplementary Table S1** Physical distance and significance of Fisher's exact test (pair-wise linkage disequilibrium test) between alleles on three supercontigs of *Sclerotinia sclerotiorum* in eight population samples after clone correction

| Locus pair                           | Distance (kb) | Pea   | Gourds | Potato (E) | Potato (D) | Lentil 2003 | Lentil 2005 | Canola (USA) | Canola (China)   |
|--------------------------------------|---------------|-------|--------|------------|------------|-------------|-------------|--------------|------------------|
| <b>Supercontig 3 (Chromosome 4)</b>  |               |       |        |            |            |             |             |              |                  |
| 3A vs. 3B                            | 56            | 0.001 | 0.0    | 0.0        | 0.0001     | 0.0003      | 0.001       | 0.0007       | 0.002            |
| 3B vs. 3C                            | 156           | 0.034 | 0.113  | 0.23       | 0.002      | 0.1106      | 0.00        | 0.087        | 1.00             |
| 3A vs. 3C                            | 212           | 0.38  | 0.001  | 0.626      | 0.004      | 0.044       | 0.09        | 0.746        | 1.00             |
| <b>Supercontig 9 (Chromosome 6)</b>  |               |       |        |            |            |             |             |              |                  |
| 9B vs. 9C                            | 1000          | 0.0   | 0.0    | 0.005      | 0.015      | 0.0001      | 0.0         | 0.011        | 0.142            |
| 9A vs. 9B                            | 4000          | 0.32  | 0.0027 | 0.287      | 0.41       | 0.07        | 0.02        | 0.51         | 0.284            |
| 9A vs. 9C                            | 5000          | 0.858 | 0.195  | 0.329      | 0.14       | 0.022       | 0.53        | 0.89         | 0.856            |
| <b>Supercontig 19 (Chromosome 5)</b> |               |       |        |            |            |             |             |              |                  |
| 19B vs. 19C                          | 14.2          | 0.769 | 0.55   | 0.0822     | 0.002      | 0.0         | 0.006       | 0.00         | n/a <sup>a</sup> |
| 19A vs. 19B                          | 247           | 0.71  | 0.65   | 0.03       | 0.06       | 0.397       | 0.0002      | 0.69         | 1.0              |
| 19A vs. 19C                          | 261.2         | 0.307 | 0.36   | 0.891      | 0.44       | 0.012       | 0.0012      | 0.08         | n/a <sup>a</sup> |

<sup>a</sup>n/a – not applicable, not tested because locus 19C was monomorphic in this population sample.
