# Supplementary material
Source: PubMed Central journal article supplement (PMC4181068)
Supplement: hdy201437x3.pdf [file hdy201437x3.pdf]

**Supplementary Table S2** Physical distance and significance of Fisher’s exact test (pair-wise linkage disequilibrium test) between alleles on three supercontigs of *Sclerotinia sclerotiorum* in seven genetic clusters (number of unique haplotypes in parenthesis) inferred by STRUCTURE after clone correction

| Locus pair                    | Distance (kb) | Genetic clusters of posterior probability |             |                  |                 |            |           |                  |
|-------------------------------|---------------|-------------------------------------------|-------------|------------------|-----------------|------------|-----------|------------------|
|                               |               | Red (23)                                  | Yellow (39) | Blue (34)        | Light Blue (22) | Brown (33) | Pink (24) | Green (29)       |
| Supercontig 3 (Chromosome 4)  |               |                                           |             |                  |                 |            |           |                  |
| 3A vs. 3B                     | 56            | 0.036                                     | 0.028       | 0.01             | 0.0             | 0.03       | 0.0       | 0.016            |
| 3B vs. 3C                     | 156           | 0.66                                      | 0.033       | 0.71             | 0.014           | 0.004      | 0.06      | 1.0              |
| 3A vs. 3C                     | 212           | 1.0                                       | 0.02        | 1.0              | 0.04            | 0.19       | 0.75      | 1.0              |
| Supercontig 9 (Chromosome 6)  |               |                                           |             |                  |                 |            |           |                  |
| 9B vs. 9C                     | 1000          | n/a <sup>a</sup>                          | 0.0         | n/a <sup>a</sup> | 0.42            | 0.0        | 0.006     | 0.12             |
| 9A vs. 9B                     | 4000          | n/a <sup>a</sup>                          | 0.01        | 0.41             | 0.4             | 0.13       | 0.31      | 0.19             |
| 9A vs. 9C                     | 5000          | n/a <sup>a</sup>                          | 0.033       | n/a <sup>a</sup> | 0.59            | 0.2        | 0.9       | 0.86             |
| Supercontig 19 (Chromosome 5) |               |                                           |             |                  |                 |            |           |                  |
| 19B vs. 19C                   | 14.2          | 1.0                                       | 0.13        | 0.03             | 0.002           | 0.27       | 0.0       | n/a <sup>a</sup> |
| 19A vs. 19B                   | 247           | 0.47                                      | 0.05        | 0.35             | 0.38            | 0.05       | 0.06      | 1.0              |
| 19A vs. 19C                   | 261.2         | 1.0                                       | 0.01        | 0.03             | 0.31            | 0.08       | 0.13      | n/a <sup>a</sup> |

<sup>a</sup>n/a – presence of monomorphic loci in the genetic clusters made LD test not applicable.
