# Supplementary material
Source: PubMed Central journal article supplement (PMC4181068)
Supplement: hdy201437x4.pdf [file hdy201437x4.pdf]

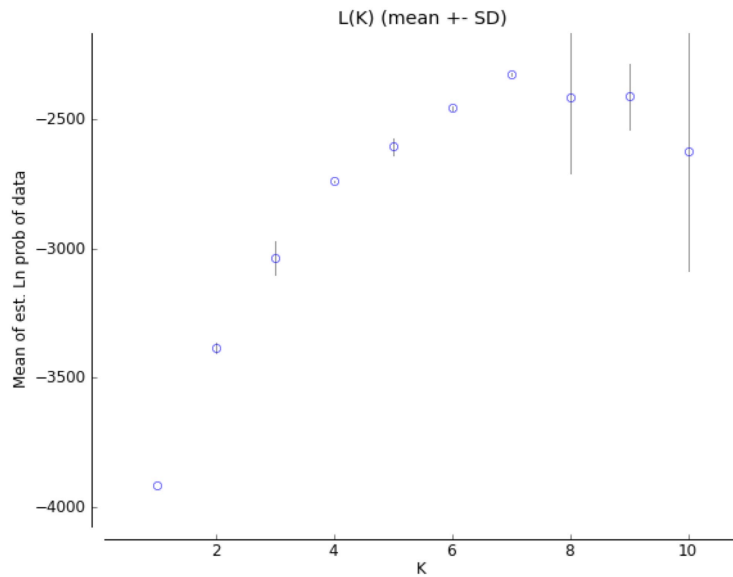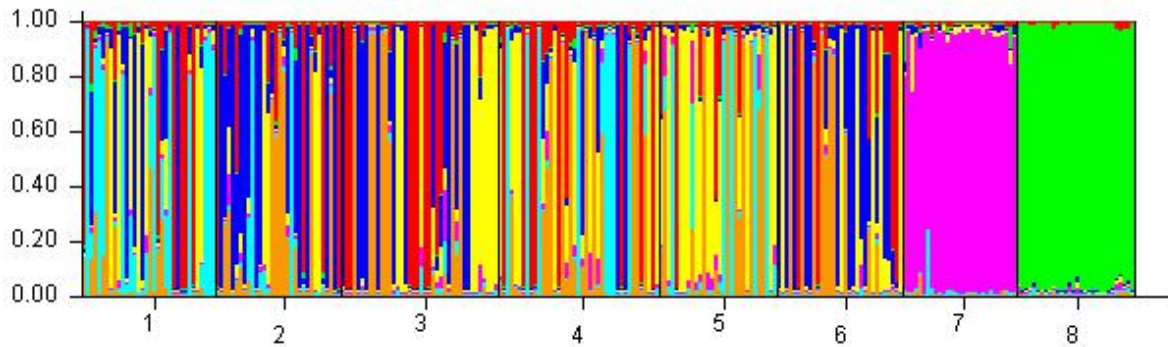

**Supplementary Figure S1. Upper:** Log probability values of Bayesian clustering with STRUCTURE showing that when the number of clusters ( $K$ ) = 7 the clustering gave the highest probability. **Lower:** Admixture proportions as inferred from Bayesian posterior probability clustering implemented in STRUCTURE. Each vertical bar represents an isolate. Each colour reflects the likelihood of belonging to one of the inferred genetic clusters. Black lines delimit sample localities labeled 1 to 8 corresponding to Table 1 and Figure 1.
