# Supplementary material
Source: PubMed Central journal article supplement (PMC4181068)
Supplement: hdy201437x5.pdf [file hdy201437x5.pdf]

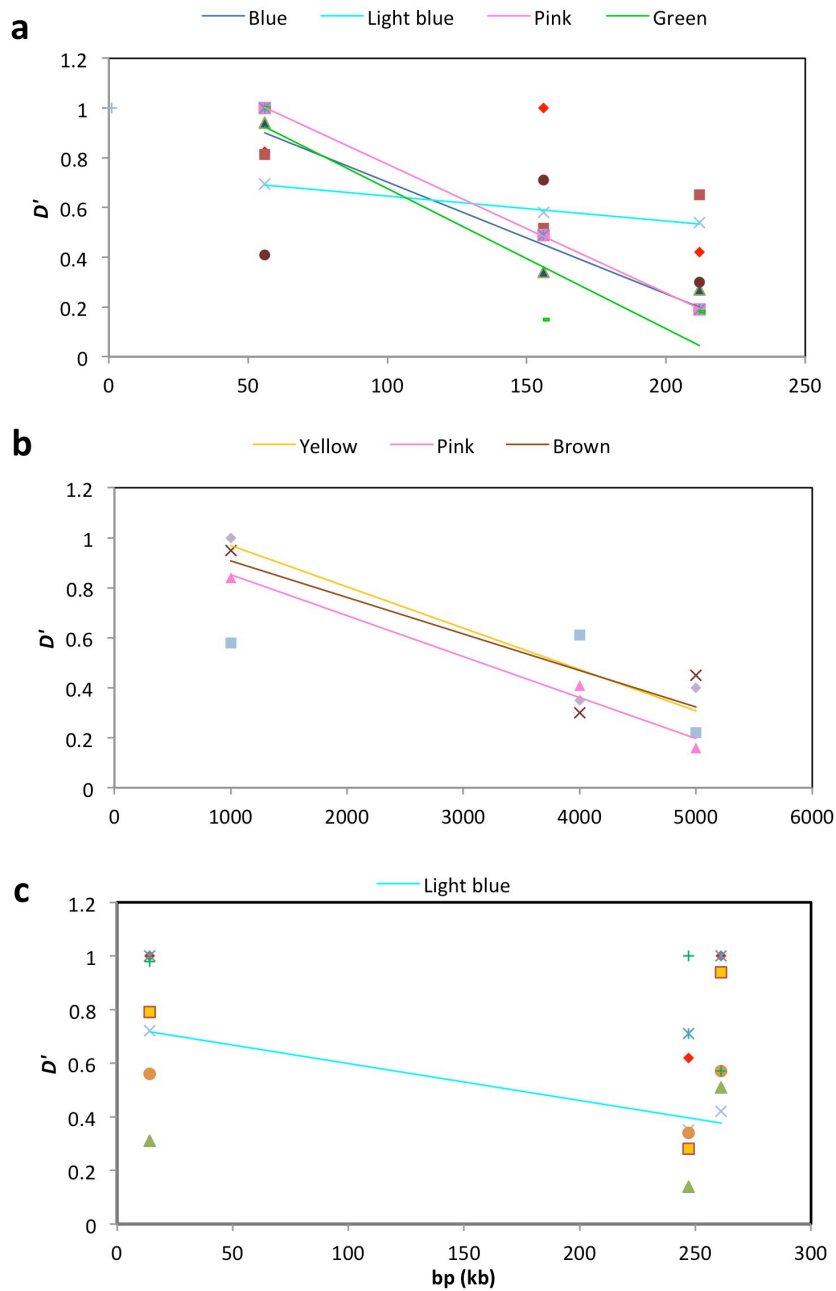

**Supplementary Figure S2.** Relationship between pair-wise linkage disequilibrium and the physical distance between markers on three supercontigs in the genetic clusters inferred by Bayesian posterior probability clustering. Trend lines were shown only to those  $R^2 > 0.5$ . a). Supercontig 3 (Chromosome 4); b) Supercontig 9 (Chromosome 6); and c) Supercontig 19 (Chromosome 5).
